# Supplementary material for: Biogeochemical variability in the central equatorial Indian Ocean during the monsoon transition
Source: Copernicus journal article supplement (doi:10.5194/bg-12-2367-2015), 2015-04-23
Supplement: Supplementary file 1 [file bg-12-2367-2015-supplement-cover-letter.pdf › bg-12-2367-2015-supplement-cover-letter.pdf]

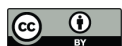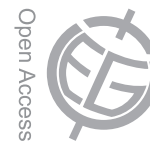

## *Supplement of*

# **Biogeochemical variability in the central equatorial Indian Ocean during the monsoon transition**

**P. G. Strutton et al.**

*Correspondence to:* P. G. Strutton (peter.strutton@utas.edu.au)

- bg-12-2367-2015-supplement-cover-letter.pdf
- \_\_MACOSX
  - .\_chl\_oscar.m4v
  - .\_mld\_mov.gif
- chl\_oscar.m4v
- mld\_mov.gif
